# Supplementary material
Source: publisher figshare collection journal article supplement (https://karger.figshare.com/articles/dataset/_/5956006)
Supplement: Supplementary file 1 [file 1]

**S-Table 1**

|                                           | <b>SGCT</b>        |                    |                    | <b>NSGCT</b>       |                    |                    |
|-------------------------------------------|--------------------|--------------------|--------------------|--------------------|--------------------|--------------------|
|                                           | <i>1987 – 2001</i> | <i>2002 – 2010</i> | <i>2011 – 2013</i> | <i>1987 – 2001</i> | <i>2002 – 2010</i> | <i>2011 – 2013</i> |
| <b>Age, median</b>                        | 37                 | 40                 | 45                 | 32                 | 36                 | 35                 |
| <b>LVI +, n (%)</b>                       | 8 (9)              | 20 (25)            | 8 (27)             | 12 (23)            | 22 (54)            | 5 (42)             |
| <b>Infiltration of rete testis, n (%)</b> | 28 (31)            | 28 (35)            | 11 (37)            | 3 (6)              | 5 (12)             | 3 (25)             |
| <b>Tumor size &gt; 4cm, n (%)</b>         | 32 (36)            | 28 (35)            | 12 (40)            | 16 (30)            | 14 (34)            | 2 (17)             |
