# Supplementary material
Source: publisher figshare collection journal article supplement (https://karger.figshare.com/articles/dataset/_/5956006)
Supplement: Supplementary file 2 [file 1]

## Calculation of cost of relapse:

Timeframe was the first year after diagnosis. We based our calculation on the following assumptions:

According to current guidelines, all stage I SGCT patients would receive active surveillance irrespective of risk factors, which lead to relapse rates of approximately 20% [1]. There seem to be risk factors indicating an elevated risk of recurrence, such as tumour size > 4cm and invasion of the rete testis, but prospective validation is still lacking [2]. Still, patients' will or doctors' preferences might differ from guidelines. AS was chosen after orchiectomy by 27% of the patients during the entire study period and by 63% of the patients in period 2011 – 2013, which is comparable to 54% recently published by Gray et al. [3].

19% of the entire cohort received carboplatin and 54% had radiotherapy, which is slightly different to 16% and 29% from the above-mentioned study, but the different periods of data acquisition might readily explain those differences. Approximately 75% of all relapses on AS occur during the first year [4]. Patients managed by either radiotherapy or one cycle carboplatin (AUC 7) have a risk of recurrence as low as 2% [2, 5]. Those relapsed would receive 3 cycles of PEB as most patients relapse in a good or intermediate prognosis stage [6]. To keep our calculation simple, we assumed that none of the relapsed patients would receive primary radiotherapy, which is a potential alternative for patients with only retroperitoneal lymph nodes < 5cm. Usually, a residual tumor resection is not necessary as the rate of complete remission is >90% [7].

In NSGCT patients, high risk and low risk of relapse are distinguished according to the risk factors vascular invasion, percentage of embryonal carcinoma and Ki-67 proliferating index. Approximately 70% percent of NSGCT CS I patients have a low risk constellation and could be managed by active surveillance [8]. Conversely, one third have a high risk of relapse and are recommended to receive one cycle of BEP [8, 9]. In our own cohort, the percentage of patients treated with chemotherapy was 47% vs. 28% managed by surveillance and 25% managed by RPLND. Low risk patients on surveillance have a 15% relapse risk whereas high risk patients have a 50% risk of recurrence which declines to 3% after 1 cycle of BEP [9]. After RPLND, approximately 25% of CS I patients are found to have pN+ and require further chemotherapy. Roughly 10% of those patients initially found pN0 after RPLND subsequently develop metastasis, mainly outside the dissected template. Altogether, some 35% of patients undergoing RPLND will later receive chemotherapy [2]. Approximately 80% of all relapses occur within 12 months after diagnosis. Disease recurrence is usually detected in a good or intermediate prognosis situation, thus 3 cycles of BEP were the basis for our cost calculation [6]. About 25% of these patients will have to undergo post-chemotherapy residual tumour resection [2].

1. Aparicio J, Garcia del Muro X, Maroto P, Paz-Ares L, Alba E, Saenz A, Terrasa J, Barnadas A, Almenar D, Arranz J: **Multicenter study evaluating a dual policy of postorchietomy surveillance and selective adjuvant single-agent carboplatin for patients with clinical stage I seminoma.** *Annals of oncology* 2003, **14**(6):867-872.
2. Albers P, Albrecht W, Algaba F, Bokemeyer C, Cohn-Cedermark G, Fizazi K, Horwich A, Laguna MP, Nicolai N, Oldenburg J: **Guidelines on testicular cancer: 2015 update.** *European urology* 2015, **68**(6):1054-1068.
3. Gray PJ, Lin CC, Sineshaw H, Paly JJ, Jemal A, Efsthathiou JA: **Management trends in stage I testicular seminoma: impact of race, insurance status, and treatment facility.** *Cancer* 2015, **121**(5):681-687.
4. Nolan L, Wheeler M, Kirby J, Simmonds P, Mead G: **Late relapse (> 2 years) on surveillance in stage I non-seminomatous germ cell tumours; predominant seminoma only histology.** *BJU international* 2010, **106**(11):1648-1651.
5. Aparicio J, Maroto P, García del Muro X, Sánchez-Muñoz A, Gumà J, Margelí M, Sáenz A, Sagastibelza N, Castellano D, Arranz J: **Prognostic factors for relapse in stage I seminoma: a**

- new nomogram derived from three consecutive, risk-adapted studies from the Spanish Germ Cell Cancer Group (SGCCG).** *Annals of oncology* 2014, **25**(11):2173-2178.
6. Kollmannsberger C, Tandstad T, Bedard PL, Cohn-Cedermark G, Chung PW, Jewett MA, Powles T, Warde PR, Daneshmand S, Protheroe A: **Patterns of relapse in patients with clinical stage I testicular cancer managed with active surveillance.** *Journal of Clinical Oncology* 2014, **33**(1):51-57.
  7. Tandstad T, Smaaland R, Solberg A, Bremnes RM, Langberg CW, Laurell A, Stierner UK, Ståhl O, Cavallin-Ståhl EK, Klepp OH: **Management of seminomatous testicular cancer: a binational prospective population-based study from the Swedish norwegian testicular cancer study group.** *Journal of Clinical Oncology* 2011, **29**(6):719-725.
  8. Beck SD: **Management options for stage 1 nonseminomatous germ cell tumors of the testis.** *Indian journal of urology: IJU: journal of the Urological Society of India* 2010, **26**(1):72.
  9. Heidenreich A, Pfister D: **Management of patients with clinical stage I nonseminomatous testicular germ cell tumours: active surveillance versus primary chemotherapy versus nerve sparing retroperitoneal lymphadenectomy.** *Arch Esp Urol* 2012, **65**(2):215-226.
