# Supplementary material
Source: publisher figshare collection journal article supplement (https://karger.figshare.com/articles/dataset/_/5956006)
Supplement: Supplementary file 3 [file 1]

S-Table 2

|                                        |                    | EAU guideline recommendations in the course of time |          |          |          |          |               |                |                |
|----------------------------------------|--------------------|-----------------------------------------------------|----------|----------|----------|----------|---------------|----------------|----------------|
|                                        |                    | 2015                                                | 2012     | 2010     | 2009     | 2008     | 2005          | 2002           | 2001           |
| <b>SGCT</b>                            |                    |                                                     |          |          |          |          |               |                |                |
| <b>Radiotherapy</b>                    |                    |                                                     |          |          |          |          |               |                |                |
|                                        | <i>CT scan</i>     | 6,12                                                | 6,12     | 6,12     | 6,12     | 6,12     | 6             | 6              | 6              |
|                                        | <i>X-ray chest</i> | 6,12                                                | 6,12     | 6,12     | 6,12     | 6,12     | 2,4,6,8,10,12 | 3,6,9,12       | 3,6,9,12       |
|                                        | <i>Markers</i>     | 4,8,12                                              | 4,8,12   | 4,8,12   | 4,8,12   | 3,6,9,12 | 2,4,6,8,10,12 | 3,6,9,12       | 3,6,9,12       |
| <b>Carboplatin chemotherapy</b>        |                    |                                                     |          |          |          |          |               |                |                |
|                                        | <i>CT scan</i>     | 6,12                                                | 6,12     | 6,12     | 6,12     | 6,12     | 6             | 6              | 3,6,9,12       |
|                                        | <i>X-ray chest</i> | 6,12                                                | 6,12     | 6,12     | 6,12     | 6,12     | 2,4,6,8,10,12 | 3,6,9,12       | 2,4,6,8,10,12  |
|                                        | <i>Markers</i>     | 4,8,12                                              | 4,8,12   | 4,8,12   | 4,8,12   | 3,6,9,12 | 2,4,6,8,10,12 | 3,6,9,12       | 2,4,6,8,10,12  |
| <b>NSGCT</b>                           |                    |                                                     |          |          |          |          |               |                |                |
| <b>BEP chemotherapy (1 - 2 cycles)</b> |                    |                                                     |          |          |          |          |               |                |                |
|                                        | <i>CT scan</i>     | 6                                                   | 6        | 6        | 6        | 6        | 6,12          | 6,12           | 6,12           |
|                                        | <i>X-ray chest</i> | 6,12                                                | 6,12     | 6,12     | 6,12     | 6,12     | 2,4,6,8,10,12 | 2,4,6,8,10,12  | 2,4,6,8,10,12  |
|                                        | <i>Markers</i>     | 3,6,9,12                                            | 3,6,9,12 | 3,6,9,12 | 3,6,9,12 | 3,6,9,12 | 2,4,6,8,10,12 | 1,2,3,4,5,6,12 | 1,2,3,4,5,6,12 |
| <b>RPLND</b>                           |                    |                                                     |          |          |          |          |               |                |                |
|                                        | <i>CT scan</i>     | 6                                                   | 6        | 6        | 6        | 6        | 6,12          | 6,12           | 6,12           |
|                                        | <i>X-ray chest</i> | 6,12                                                | 6,12     | 6,12     | 6,12     | 6,12     | 2,4,6,8,10,12 | 2,4,6,8,10,12  | 2,4,6,8,10,12  |
|                                        | <i>Markers</i>     | 3,6,9,12                                            | 3,6,9,12 | 3,6,9,12 | 3,6,9,12 | 3,6,9,12 | 2,4,6,8,10,12 | 1,2,3,4,5,6,12 | 1,2,3,4,5,6,12 |
